# Supplementary material
Source: publisher figshare collection journal article supplement (https://tandf.figshare.com/articles/dataset/_/6495281)
Supplement: Supplementary file 1 [file 1]

The **teacher questionnaires (study 1)** included:

1. Did you find the prepared material (material kit, power point presentation, teacher brochure with prepared worksheets) relevant for your curricula?

2. Which of the materials did you already use or plan on using?

Material kit:            presentation:            teacher brochure:            worksheets:

3. Which thematic aspects did you use the material for?

Subject:            class/age group:            thematic aspect:

4. Did you find the mineral resource box supportive or do you think disassembling the phone itself would be sufficient?

5. Did you find the teacher workshop as a preparation for using the material kit useful?

6. Would you have used the hands-on material without the preparation workshop?
