# Supplementary material
Source: publisher figshare collection journal article supplement (https://tandf.figshare.com/articles/dataset/_/6495281)
Supplement: Supplementary file 2 [file 1]

List of elements that can be part of a mobile phone:

|    |    |      |    |    |    |    |    |    |    |    |    |    |    |    |    |    |  |    |    |
|----|----|------|----|----|----|----|----|----|----|----|----|----|----|----|----|----|--|----|----|
| H  |    |      |    |    |    |    |    |    |    |    |    |    |    |    |    |    |  |    | He |
| Li | Be |      |    |    |    |    |    |    |    |    |    | B  | C  | N  | O  | F  |  | Ne |    |
| Na | Mg |      |    |    |    |    |    |    |    |    |    | Al | Si | P  | S  | Cl |  | Ar |    |
| K  | Ca | Sc   | Ti | V  | Cr | Mn | Fe | Co | Ni | Cu | Zn | Ga | Ge | As | Se | Br |  | Kr |    |
| Rb | Sr | Y    | Zr | Nb | Mo | Tc | Ru | Rh | Pd | Ag | Cd | In | Sn | Sb | Te | I  |  | Xe |    |
| Cs | Ba | *Lu  | Hf | Ta | W  | Re | Os | Ir | Pt | Au | Hg | Tl | Pb | Bi | Po | At |  | Rn |    |
| Fr | Ra | **Lr | Rf | Db | Sg | Bh | Hs | Mt |    |    |    |    |    |    |    |    |  |    |    |

|              |    |    |    |    |    |    |    |    |    |    |    |    |    |    |
|--------------|----|----|----|----|----|----|----|----|----|----|----|----|----|----|
| *Lanthanoids | La | Ce | Pr | Nd | Pm | Sm | Eu | Gd | Tb | Dy | Ho | Er | Tm | Yb |
| **Actinoids  | Ac | Th | Pa | U  | Np | Pu | Am | Cm | Bk | Cf | Es | Fm | Md | No |

Please keep in mind that most elements only occur in tiny amounts in a mobile phone and that different phone models (especially year of model-making) vary in content.

The metals that make up the main part of a mobile phone are copper, silicon, aluminum, magnesium, tin and lithium.
