# Supplementary material
Source: publisher figshare collection journal article supplement (https://tandf.figshare.com/articles/dataset/_/6495281)
Supplement: Supplementary file 3 [file 1]

Student questions (study 2) included:

1. Name some raw materials that can be found in a cell phone.
2. Do you think that the USA (Austria respectively) produces all raw materials and commodities needed to manufacture our goods?
3. What is plastic made up of?
4. Why should cell phones be recycled?
5. Specifically which parts of a cell phone need to be carefully recycled and why?
6. How would you define the term “sustainability”?

Qualitative questions with open ended responses (Posttests only):

7. Which information did you find most interesting today?
8. How would you explain to a friend that unused old cell phones should not be left in the drawer?
9. Any other feedback and comments are appreciated.
