# Supplementary material
Source: publisher figshare collection journal article supplement (https://tandf.figshare.com/articles/dataset/_/6495281)
Supplement: Supplementary file 4 [file 1]

Archive with 9 entries (9 files):
- ujge_a_11968563_sm0001.docx
- ujge_a_11968563_sm0002.docx
- ujge_a_11968563_sm0003.jpg
- ujge_a_11968563_sm0004.jpg
- ujge_a_11968563_sm0005.pdf
- ujge_a_11968563_sm0006.pdf
- ujge_a_11968563_sm0007.pdf
- ujge_a_11968563_sm0009.jpg
- ujge_a_11968563_sm0010.jpg
