# Supplementary material
Source: publisher figshare collection journal article supplement (https://tandf.figshare.com/articles/dataset/_/6495281)
Supplement: Supplementary file 4 [file 1 › ujge_a_11968563_sm0001.docx]

**Instructions for Supplements 1c, 1d**

We recommend the mineral identifications quiz (supplement 1c) to be printed in DIN A3 and laminated for repeated usage.

Supplement 1d, which is a list of the minerals resources represented in the box, should also be laminated for better handling and repeated usage and cut into single light grey and dark grey cards.

**Safety Standard Measurements**

If you wish to follow our steps with the minerals raw materials box, please always keep **standard laboratory security measurements** in mind: Although none of the raw materials we used are toxic, please make sure by asking the supplier where you obtain your minerals from that this is the case for your minerals, too. Always remind students not to eat or lick on minerals and always have students wash their hands after the exercise.

When students disassemble the mobile phone, make sure they extract the battery first and never do any experiments with the battery.

Tell students to be careful when disassembling the phones with screwdrivers or sharp objects. When time is limited, we found that removing the screws beforehand (or not putting them back in) helped in speeding up the process. Most of the older mobile phones can be disassembled multiple times if students take care in not breaking anything.
