# Supplementary material
Source: publisher figshare collection journal article supplement (https://tandf.figshare.com/articles/dataset/_/6495281)
Supplement: Supplementary file 4 [file 1 › ujge_a_11968563_sm0002.docx]

**Teaching Instructions Mobile Phone Mineral Resource Box**

© Britta Bookhagen, BGR

1. Disassemble a mobile phone and fill in the table:

1. Which parts do you find in a mobile phone?
2. What materials are the parts made up of? Discuss where the materials come from.

| **Parts** | **Material** |
| --- | --- |
|  |  |
|  |  |
|  |  |
|  |  |
|  |  |
|  |  |
|  |  |
|  |  |

**Mineral Identification Quiz and cards**

1. Use the **Mineral Identification Quiz** and determine the minerals/rocks (put them right next to their name)

2. Sort the correct cards to the minerals. Each mineral should get one light grey card for „Element/Resource“ and one dark grey card for „Usage in Mobile Phone“. Use the bold headlines as path.

3. Sort the parts from the disassembled mobile phone to their corresponding mineral(s).

**Please note:**

**Always keep standard laboratory security measurements in mind: Although none of the raw materials are toxic, do not eat or lick on minerals and always wash your hands after the exercise.**
