# Supplementary material
Source: publisher figshare collection journal article supplement (https://tandf.figshare.com/articles/dataset/_/6495281)

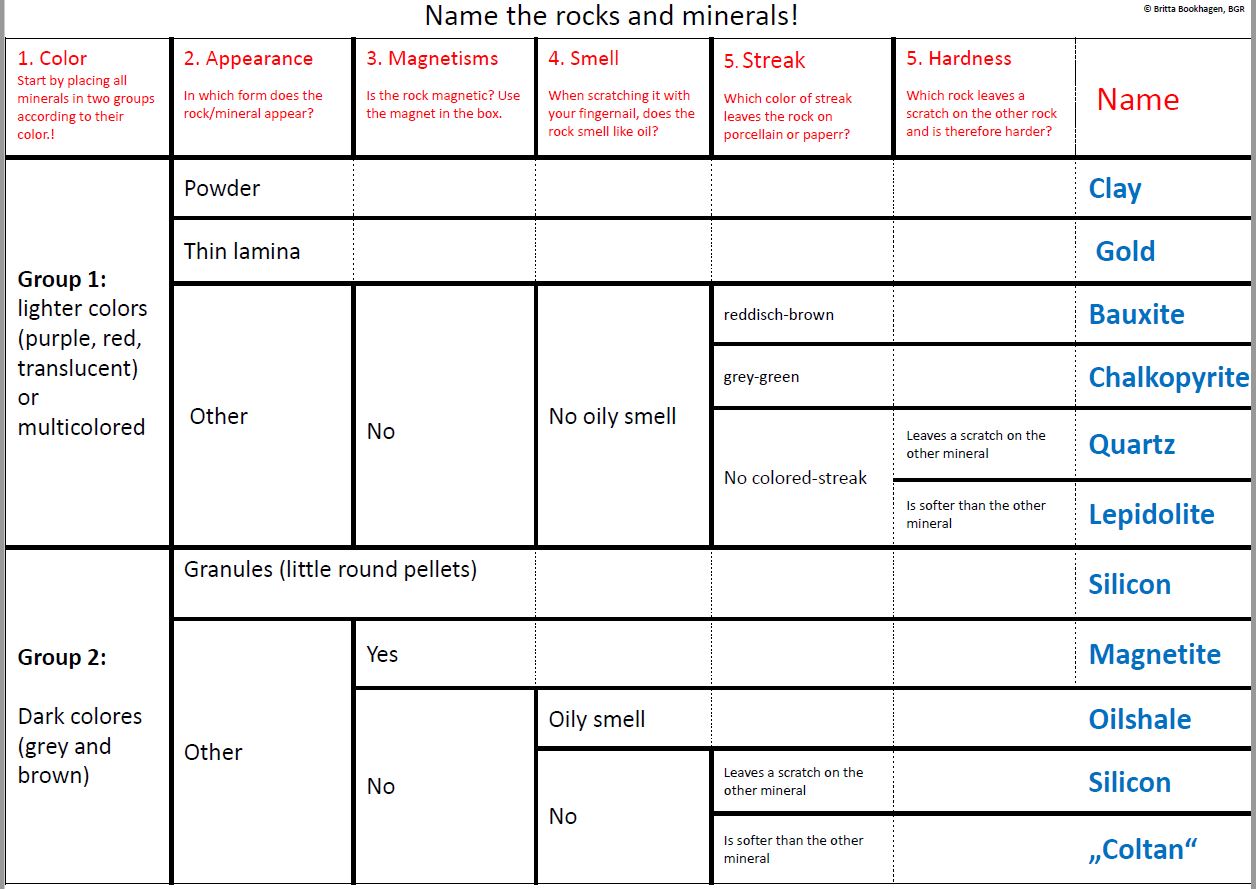

Supplement: Supplementary file 4 [file 1 › ujge_a_11968563_sm0003.jpg]

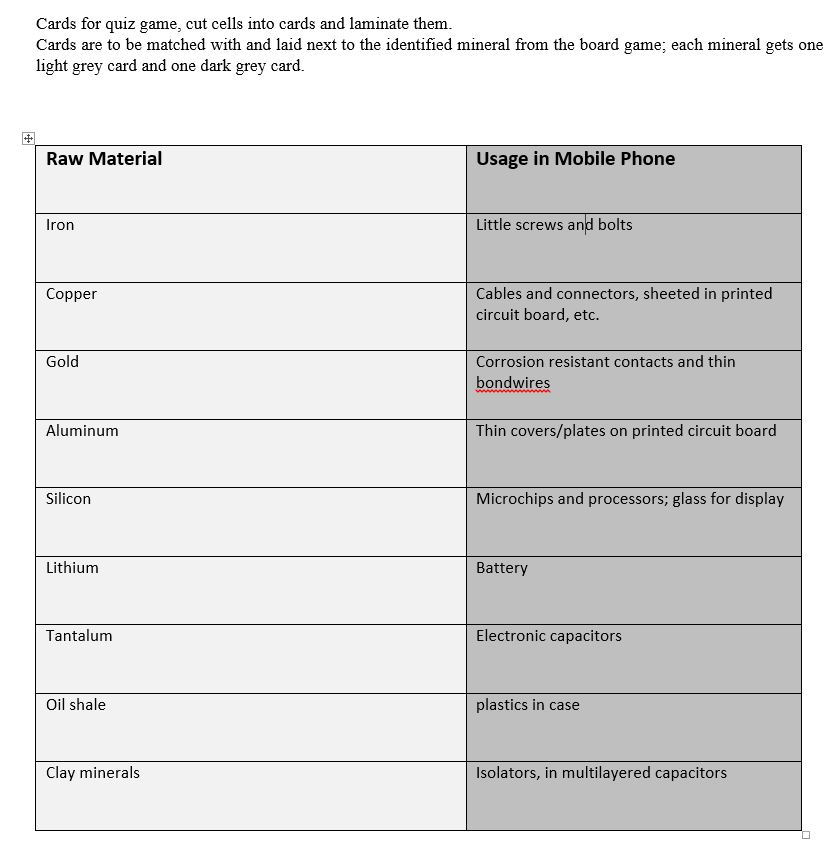

Supplement: Supplementary file 4 [file 1 › ujge_a_11968563_sm0004.jpg]

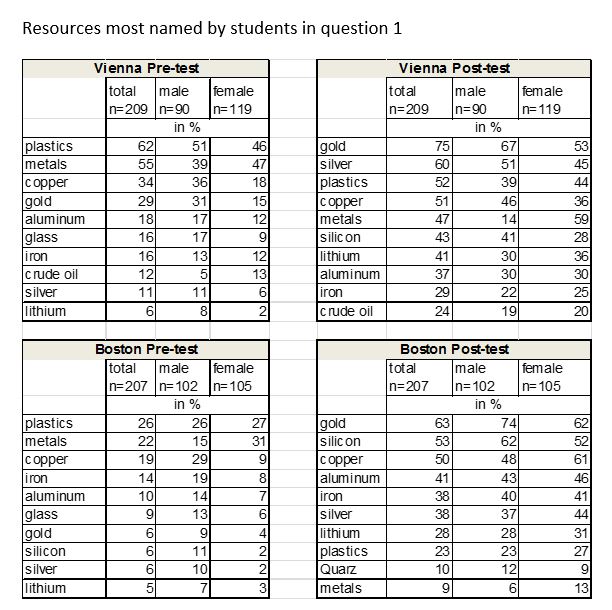

Supplement: Supplementary file 4 [file 1 › ujge_a_11968563_sm0009.jpg]

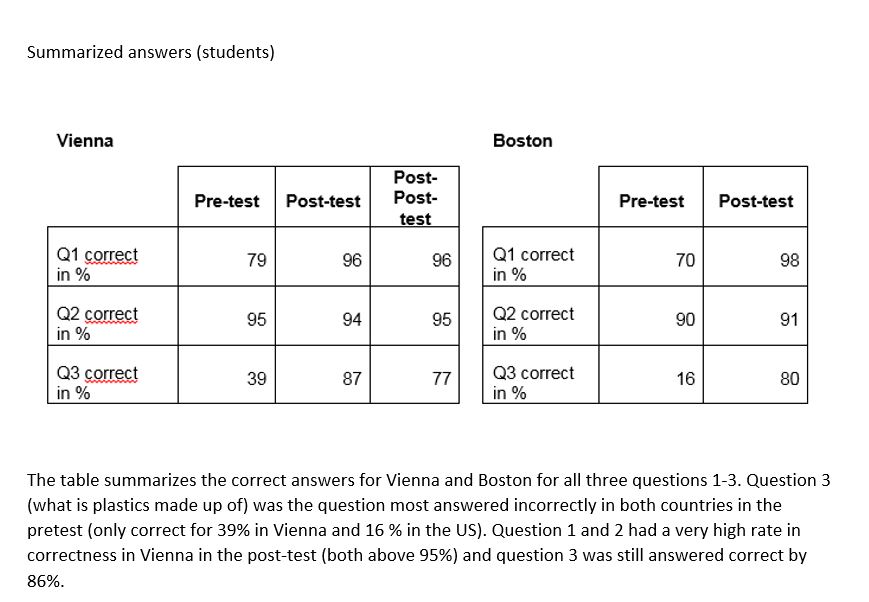

Supplement: Supplementary file 4 [file 1 › ujge_a_11968563_sm0010.jpg]
